# Supplementary material
Source: publisher site journal article supplement (https://www.dovepress.com/article/415989)
Supplement: Supplementary file 1 [file get_supplementary_file.php]

**Supplementary table 1 Full list of survey questions**

| **ID** | **Question** | **Answer type** | **Answer options** |
| --- | --- | --- | --- |
| Q1 | Which country are you active in as a surgeon? | Dropdown list | Australia  Canada  France  Germany  Italy  New Zealand  USA |
| Q2 | What is your surgical speciality? | Dropdown list (+ free text to specify if option “Other” is chosen) | Bariatric  General  Other (please specify) |
| Q3 | Which surgical stapling system(s) do you use during bariatric surgery? | Multiple numerical input (0%-100%, sum over all options must equal 100%) | Echelon Flex™ powered stapling system (Ethicon)  Echelon Flex™ manual stapling system (Ethicon)  Signia™ Tri-Staple™ (Medtronic)  Endo GIA™ Tri-Staple™ (Medtronic)  SureForm™ stapling system (Intuitive)  Other |
| Q3a | If the value for option “Other” was >0% in Q3:  Please indicate which other surgical stapling system(s) you use for bariatric surgery. | Free text | n/a |
| Q4 | Do you use staple line reinforcement during bariatric surgery? | Single choice | Yes  No |
| Q5 | Do you use reinforcement in every case? | Single choice | Yes  No |
| Q6 | How often do you use staple line reinforcement? Answer the percentage of sleeve and Roux-en-Y gastric bypass cases where you use reinforcement. | Numerical input (0%-100%) | Of all surgeries, I use staple line reinforcement in x% of cases. |
| Q7 | How many sleeve gastrectomies do you perform each month? | Numerical input (integer) | n/a |
| Q7a | If the value in Q7 is >0:  Which staple line reinforcement method do you use during sleeve gastrectomy? | Multiple numerical input (0%-100%, sum over all options must equal 100%) | Gore (Seamguard)  Reinforced Reload (Medtronic)  Echelon Endopath™ Staple Line Reinforcement (Ethicon)  Other |
| Q7b | If the value for option “Other” was >0% in Q7a:  Which other staple line reinforcement method do you use during sleeve gastrectomy? | Free text | n/a |
| Q9 | Please indicate how many of each stapler cartridge sizes you use in a standard sleeve gastrectomy. | Numerical input (integer) | 30 mm (without buttressing)  30 mm (with buttressing)  45 mm (without buttressing)  45 mm (with buttressing)  60 mm (without buttressing)  60 mm (with buttressing) |
| Q10 | How many Roux-en-Y gastric bypass (RYGB) surgeries do you perform each month? | Numerical input (integer) | n/a |
| Q10a | If the value in Q10 is >0:  Which staple line reinforcement method do you use during RYGB? | Multiple numerical input (0%-100%, sum over all options must equal 100%) | Gore (Seamguard)  Reinforced Reload (Medtronic)  Echelon Endopath™ Staple Line Reinforcement (Ethicon)  Other |
| Q10b | If the value for option “Other” was >0% in Q10a:  Which other staple line reinforcement method do you use during RYGB? | Free text | n/a |
| Q12 | Please indicate how many of each stapler cartridge sizes you use in a standard RYGB. | Numerical input (integer) | 30 mm (without buttressing)  30 mm (with buttressing)  45 mm (without buttressing)  45 mm (with buttressing)  60 mm (without buttressing)  60 mm (with buttressing) |
| Q13 | Assuming that two surgical stapling devices have equivalent patient outcomes, how important are the following in your purchasing decision? | Ranking | Ease of use  Price  Environmental impact |
| Q14 | Are you concerned about the environmental impact of surgical procedures? | Single choice | Yes  No |
| Q15 | How concerned are you about the following regarding the environmental impact of surgical procedures?   - Depletion of natural resources (e.g., water, land, fuels, minerals) - Human toxicity (due to waste and pollutants) - Ozone depletion (reduction in the protection of the sun) - Climate change (global warming, natural disasters) | Single choice per subquestion | Very concerned  Somewhat concerned  Not very concerned  Not concerned at all |
| Q16 | Is there any policy in place that apply to your department which promotes environmentally friendly purchasing/decision/surgeries? | Single choice | Yes  No |
| Q17 | Have you made any changes in your work practice based on the environmental concerns? | Single choice | Yes, daily  Yes, weekly  Yes, monthly  No, never |
| Q18 | Are there other areas within bariatric surgery that you think could be improved from an environmental perspective? | Free text | n/a |
